# Supplementary material for: Antibodies targeting the glycan cap of Ebola virus glycoprotein are potent inducers of the complement system
Source: PubMed Central journal article supplement (PMC11255267; doi:10.1038/s42003-024-06556-0), 2024-07-17
Supplement: 42003_2024_6556_MOESM1_ESM.pdf [file 42003_2024_6556_MOESM1_ESM.pdf]

## Description of Additional Supplementary Files

**File name:** Supplementary Datasheet 1

**Description:** Source data behind the figures
